# Supplementary material for: Trends in Early-Stage Cervical Cancer Management in the US: A National Cancer Database Analysis
Source: MDPI journal article supplement (doi:10.3390/curroncol31050215), 2024-05-16
Supplement: s1 [file s1]

# Trends in Early-Stage Cervical Cancer Management in the US: A National Cancer Database Analysis

**Supplemental Table S2.** Trends in surgical approach for patients undergoing primary radical hysterectomy before and after the LACC trial publication.

|                                | Pre-LACC<br>MIS, n=2,853<br>Open, n=1,052 | Post-LACC<br>MIS, n=423<br>Open, n=1044 |
|--------------------------------|-------------------------------------------|-----------------------------------------|
| MIS                            |                                           |                                         |
| Laparoscopic                   | 208 (15%)                                 | 158 (37%)                               |
| Robotic-assisted               | 1201 (85%)                                | 265 (63%)                               |
| Open                           |                                           |                                         |
| Open                           | 537 (95%)                                 | 1026 (98%)                              |
| Laparoscopic converted to open | 11 (1.9%)                                 | 12 (1.1%)                               |
| Robotic converted to open      | 18 (3.2%)                                 | 6 (0.6%)                                |

Abbreviations: LACC, Laparoscopic Approach to Cervical Cancer; MIS, Minimally Invasive Surgery. Results are n (%).
