# Supplementary material for: Trends in Early-Stage Cervical Cancer Management in the US: A National Cancer Database Analysis
Source: MDPI journal article supplement (doi:10.3390/curroncol31050215), 2024-05-16
Supplement: s1 [file s1]

# Trends in Early-Stage Cervical Cancer Management in the US: A National Cancer Database Analysis

**Supplemental Table S1.** Trends in radicality of surgery for patients undergoing primary hysterectomy before and after the LACC trial publication.

|                   | Pre-LACC<br>n=4,257 | Post-LACC<br>n=3,090 | p-value          |
|-------------------|---------------------|----------------------|------------------|
| MIS Hysterectomy  |                     |                      | <b>&lt;0.001</b> |
| Simple            | 990 (35%)           | 491 (45%)            |                  |
| Radical           | 1409 (49%)          | 423 (39%)            |                  |
| Other             | 454 (16%)           | 177 (16%)            |                  |
| Open Hysterectomy |                     |                      | <b>0.0049</b>    |
| Simple            | 306 (29%)           | 442 (25%)            |                  |
| Radical           | 566 (54%)           | 1044 (60%)           |                  |
| Other             | 180 (17%)           | 252 (14%)            |                  |

Abbreviations: LACC, Laparoscopic Approach to Cervical Cancer; MIS, Minimally Invasive Surgery. Results are n (%).
