# Supplementary material for: Trends in Early-Stage Cervical Cancer Management in the US: A National Cancer Database Analysis
Source: MDPI journal article supplement (doi:10.3390/curroncol31050215), 2024-05-16
Supplement: s1 [file s1]

# Trends in Early-Stage Cervical Cancer Management in the US: A National Cancer Database Analysis

**Supplemental Table S3.** Clinicopathologic characteristics of patients who underwent primary chemoradiation compared to primary surgery.

|                            | Primary<br>Chemoradiation<br>n=583 | Primary<br>Hysterectomy<br>n=7,347 | p-value |
|----------------------------|------------------------------------|------------------------------------|---------|
| Age, mean (SD)             | 54.82 (16.75)                      | 47.14 (12.59)                      | <0.001  |
| Race                       |                                    |                                    | <0.001  |
| White                      | 442 (76%)                          | 5867 (80%)                         |         |
| Black                      | 100 (17%)                          | 721 (9.8%)                         |         |
| Asian                      | 21 (3.6%)                          | 377 (5.1%)                         |         |
| Other                      | 15 (2.6%)                          | 271 (3.7%)                         |         |
| Unknown                    | 5 (0.9%)                           | 111 (1.5%)                         |         |
| Ethnicity                  |                                    |                                    | 0.061   |
| Hispanic                   | 71 (12%)                           | 1163 (16%)                         |         |
| Non-Hispanic               | 502 (86%)                          | 6050 (82%)                         |         |
| Unknown                    | 10 (1.7%)                          | 134 (1.8%)                         |         |
| Insurance                  |                                    |                                    | <0.001  |
| Private                    | 263 (45%)                          | 4511 (61%)                         |         |
| Medicaid/Medicare          | 292 (50%)                          | 2457 (33%)                         |         |
| Uninsured                  | 26 (4.5%)                          | 314 (4.3%)                         |         |
| Unknown                    | 2 (0.3%)                           | 65 (0.9%)                          |         |
| Charlson Comorbidity Index |                                    |                                    | <0.001  |
| 0                          | 458 (79%)                          | 6290 (86%)                         |         |
| 1                          | 68 (12%)                           | 792 (11%)                          |         |
| 2                          | 30 (5.1%)                          | 155 (2.1%)                         |         |
| ≥3                         | 27 (4.6%)                          | 110 (1.5%)                         |         |
| Stage                      |                                    |                                    | <0.001  |
| IA2                        | 48 (8.2%)                          | 1127 (15%)                         |         |
| IB1                        | 535 (92%)                          | 6220 (85%)                         |         |
| Histology                  |                                    |                                    | <0.001  |
| Squamous cell carcinoma    | 408 (70%)                          | 3759 (51%)                         |         |
| Adenocarcinoma             | 110 (19%)                          | 2711 (37%)                         |         |
| Adenosquamous carcinoma    | 23 (3.9%)                          | 300 (4.1%)                         |         |
| Unknown                    | 42 (7.2%)                          | 577 (7.9%)                         |         |
| Tumor size                 |                                    |                                    | <0.001  |
| ≤2cm                       | 148 (25%)                          | 3475 (47%)                         |         |
| >2cm - ≤4cm                | 229 (39%)                          | 2474 (34%)                         |         |
| Unknown                    | 206 (35%)                          | 1398 (19%)                         |         |
| LVSI present               | 119 (20%)                          | 2293 (31%)                         | <0.001  |

Abbreviations: LACC, Laparoscopic Approach to Cervical Cancer; SD, standard deviation; LVSI, lymphovascular space invasion. Results are n (%) unless otherwise reported.
